1 **Accelerating surveillance and research of antimicrobial resistance –**  
2 **an online repository for sharing of antimicrobial susceptibility data**  
3 **associated with whole genome sequences.**

4 Sébastien Matamoros<sup>1#</sup>; Rene. S. Hendriksen<sup>2</sup>; Balint Pataki<sup>3,4</sup>; Nima Pakseresht<sup>5</sup>; Marc Rossello<sup>5</sup>;  
5 Nicole Silvester<sup>5</sup>; Clara Amid<sup>5</sup>; COMPARE ML- AMR group\*; Guy Cochrane<sup>5</sup>; Istvan Csabai<sup>3,4</sup>; Ole  
6 Lund<sup>2</sup>; Constance Schultz<sup>1,6</sup>.

7 <sup>1</sup>: Amsterdam UMC, University of Amsterdam, Department of Medical Microbiology, Amsterdam, The  
8 Netherlands.

9 <sup>2</sup>: National Food Institute, Technical University of Denmark, Lyngby, Denmark.

10 <sup>3</sup>: Department of Physics of Complex Systems, ELTE Eötvös Loránd University, Budapest, Hungary.

11 <sup>4</sup>: Department of Computational Sciences, Wigner Research Centre for Physics of the HAS, Budapest,  
12 Hungary.

13 <sup>5</sup>: European Molecular Biology Laboratory (EMBL), European Bioinformatics Institute (EBI), Wellcome  
14 Genome Campus, Hinxton, Cambridge, CB10 1SD, UK.

15 <sup>6</sup>: Amsterdam UMC, University of Amsterdam, Department of Global Health, Amsterdam Institute for  
16 Global Health and Development, Amsterdam, The Netherlands.

17 \*: see the full list of the COMPARE ML-AMR group members in acknowledgements.

18 #: Corresponding author: Sébastien Matamoros, Department of Medical Microbiology, Amsterdam  
19 UMC, location AMC, University of Amsterdam, Meibergdreef 9, 1105 AZ Amsterdam, The  
20 Netherlands. E-mail: [sebastien.matamoros@gmail.com](mailto:sebastien.matamoros@gmail.com)

21

22 **Abstract**

23 Antimicrobial resistance (AMR) is an emerging threat to modern medicine. Improved diagnostics and  
24 surveillance of resistant bacteria require the development of next generation analysis tools and  
25 collaboration between international partners. Here, we present the “AMR data hub”, an online  
26 infrastructure for storage and sharing of structured phenotypic AMR data linked to bacterial genome  
27 sequences.

28 Leveraging infrastructure built by the European COMPARE Consortium and structured around the  
29 European Nucleotide Archive (ENA), the AMR data hub already provides an extensive data collection  
30 for some 500 isolates with linked genome and AMR data. Representing these data in standardized  
31 formats, we provide tools for the validation and submission of new data and services supporting  
32 search, browse and retrieval.

33 The current collection was created through a collaboration by several partners from the European  
34 COMPARE Consortium, demonstrating the capacities and utility of the AMR data hub and its  
35 associated tools. We anticipate growth of content and offer the hub as a basis for future research  
36 into methods to explore and predict AMR.

## 37 Introduction

38 Antimicrobials are widely regarded as one of the major advances in modern medicine <sup>1</sup>. The global  
39 emergence, however, of antimicrobial resistance (AMR) threatens the very core of modern medicine  
40 with the potential to turn the global population back in time to the pre-antibiotic era in which simple  
41 surgical procedures and common infections could have deadly consequences <sup>2</sup>.

42 The decreased costs of next generation sequencing (NGS) combined with the progress made in big  
43 data analysis such as machine learning (ML) represent innovative opportunities to tackle the AMR  
44 crisis<sup>3</sup>. Many bacterial phenotypic traits, including AMR, can be directly linked to the presence of  
45 genomic determinants such as genes, Single Nucleotide Polymorphism's (SNPs) or transcription  
46 promoters which can be identified using functional genomics approaches on large databases of  
47 genomes. Recent studies have used computational approaches such as ML to predict antimicrobial  
48 susceptibility from genomic data or to discover previously unidentified antibiotic resistance  
49 determinants<sup>4-6</sup>. Today, the major limitation for such approaches is not the lack of advanced  
50 computational methods or hardware resources but the lack of large enough well curated, annotated  
51 data sets where phenotypic AMR data and genomes are linked.

52 Academic research initiatives and public health organisations could benefit from the implementation  
53 of online repositories capable of storing large amounts of genome sequence and antimicrobial  
54 susceptibility testing (AST) data. <sup>7</sup> For example, the PATRIC database (<https://patricbrc.org/> <sup>6</sup>) has  
55 been used for development of AMR prediction algorithms, but is a closed architecture using a project  
56 specific data entry template. The NCBI is offering a similar service, linking antibiograms with genomes  
57 deposited in the Sequence Repository Archive (SRA), but all data have to be made public immediately  
58 (<https://www.ncbi.nlm.nih.gov/pathogens/isolates#/search/>).

59 Different stakeholders in the AMR field may have different requirements regarding the accessibility  
60 of AST data. Making optimal use of the opportunities described above requires enabling the global  
61 sharing of data, but some institutions are reluctant to immediately make their AST data publicly  
62 accessible for privacy, legal or other reasons <sup>8</sup>. National public health institutes would be encouraged  
63 to create supra-national networks using a standard format to share data for AST result analysis, while  
64 academics would find a solution to share post-publication data, encouraging reproducibility and  
65 cross-validation experiments, if such a database structure would become available. Thus, we have  
66 identified a clear need for a database structure that can support public AST data as well as those data  
67 that are to be shared privately for a period of time until publication.

68 The Horizon 2020 funded EU consortium COMPARE aims at bringing NGS to public health and clinical  
69 practice (<http://www.compare-europe.eu/>). European experts in AMR working within the COMPARE  
70 consortium, including the European Bioinformatics Institute (EMBL-EBI), which is part of the  
71 International Nucleotide Sequence Database Collaboration (INSDC; <http://www.insdc.org/>), have  
72 deployed the "data hub" system to allow sharing of isolate NGS and linked phenotypic AMR data.  
73 The data hub system allows data providers, such as public health and clinical laboratories, food  
74 safety agencies and veterinary institutes, to share and download genomic and related data sets. Data  
75 can either be kept private (pre-publication) or released as open-access at the discretion of the data  
76 providers (Amid *et al.*, 2019, *in preparation*). Novel software was developed for use in the AMR data  
77 hub that validates the conformity of submitted datasets. The system supports both qualitative and  
78 quantitative AST data such as those resulting from disk diffusion and micro-broth dilution tests. The

79 AMR data hub “Notebook” reporting system has been configured to support rapid data mining of  
80 content.

81 Here, we present the AMR data hub, which permits sharing of large amounts of information that  
82 could be used for ML and other data analysis approaches, eventually resulting in accurate and  
83 quantitative, hence clinically relevant, predictions of AMR phenotypes based on NGS data.

84

## 85 **The AMR data hub**

### 86 **The data hub system**

87 The data hub system has been built as a broad infrastructure for the sharing and analysis of pathogen  
88 NGS data and related data types. Here is presented a brief outline of the system while a full  
89 description is provided in Amid *et al.*, (2019, in preparation). The data hubs are provided upon the  
90 foundation of the European Nucleotide Archive (ENA; <https://www.ebi.ac.uk/ena>), an open  
91 repository for sequence and related data<sup>9</sup>. The concept was developed and introduced as a model  
92 for rapid sharing of data and analysis outputs in public and pre-publication confidential status within  
93 the COMPARE consortium. Data hubs are restricted (by login and password) to the members of the  
94 project authorized to access the data. Pre-publication confidential data sharing between partners has  
95 been considered only in projects where immediate release of data/metadata was not possible, i.e.  
96 sensitive content has been awaiting publication, but partners needed access to confidential data for  
97 analysis. Ultimately, all data archived in data hubs are released into the public domain (the standard  
98 ENA database) after a period defined by data owners. Data and metadata reported by data providers  
99 are submitted to the hubs through systematic processes supported by a number of tools.  
100 Subsequently, structured and accessioned data/metadata are available for sharing between data  
101 consumers who have received consent from data providers. Data appropriate for a given  
102 computational analysis are selected and fed autonomously through cloud-based analysis workflows  
103 of which the outputs – “derived” data products – are fed back into the system.

104

### 105 **The antibiogram**

106 In order to represent AST data, we have defined a new data type, the “antibiogram”, for use within  
107 the AMR data hub and, more broadly, within ENA. This new data type leverages the extensible  
108 “analysis object” system, with the addition of a new class specifically for the storage of phenotypic  
109 AMR data, designated “AMR\_ANTIBIOGRAM”. Antibiograms are treated as data objects within the  
110 system and are supported in data submission and access services. As a new data type, building this  
111 support has required the development of open software that is distributed publicly  
112 (<https://github.com/EBI-COMMUNITY/compare-amr>) and used internally at EMBL-EBI for the  
113 validation and submission of incoming AST data.

114 We have aimed with the antibiogram for a format that is flexible and complete. Minimum  
115 requirements include, for each combination of isolate/ antibiotic provided, INSDC Sample accession  
116 (SAM\*); species; antibiotic name; antibiotic susceptibility testing standard; breakpoint version;  
117 antibiotic susceptibility test method; measurement; measurement units; measurement sign;  
118 susceptibility phenotype; and test platform. Any combination of bacterial species and antimicrobial is  
119 supported. Reported antimicrobial susceptibility can be measured by microbroth dilution or zone

120 diameter, all major testing platforms (Sensititre, VITEK and Phoenix) and standards (EUCAST or CLSI)  
121 are accepted. More uncommon methods can be added by using the free-text format of these  
122 sections. To help data providers, a detailed protocol explaining the preparation of the metadata form  
123 is presented on the GitHub repository of the project ([https://github.com/EBI-COMMUNITY/compare-](https://github.com/EBI-COMMUNITY/compare-amr)  
124 [amr](https://github.com/EBI-COMMUNITY/compare-amr)) along with tools for batch creation of antibiograms from excel files. An interactive web page  
125 allowing the manual creation of antibiograms is in preparation. It will provide an easy alternative for  
126 data providers registering a limited number of samples. Finally, a tutorial explaining the steps  
127 required to retrieve data (genomes and antibiograms) from the datahub is available on the GitHub  
128 repository

129 Each antibiogram is linked to a bacterial genome within ENA. The association is asserted by linking  
130 the analysis object, i.e. the antibiogram, with the corresponding study, example:  
131 <https://www.ebi.ac.uk/ena/data/view/PRJEB14981>. As with other data deposited in the ENA,  
132 antibiograms can be kept confidential for a provider-defined period but must ultimately be released  
133 into public view. Antibigrams can be queried and retrieved through the AMR data hub (while  
134 confidential) as well as (when made public) through other alternatives, such as the Pathogen data  
135 portal (<https://www.ebi.ac.uk/ena/pathogens/home><sup>1</sup>), a Discovery Application Programming  
136 Interface (API - <https://www.ebi.ac.uk/ena/portal/api/>), the ENA browser  
137 (<https://www.ebi.ac.uk/ena>) and services providing high-volume data access such as the ENA File  
138 Downloader (<https://github.com/enasequence/ena-ftp-downloader/>) for public data. Using the  
139 Pathogen data portal or the API, various filters can be used to refine the query such as bacterial  
140 species, country of origin, host, and more.

141

## 142 **Visualisation tools**

143 To visualize the contents of the AMR data hub, a Notebook was configured (Figure 1) that has several  
144 options for comparison of a defined set of parameters from the database, such as the distribution of  
145 the minimal inhibitory concentration (MIC) of different antimicrobials as a function of the country of  
146 origin, or the comparison of MIC distributions between different antimicrobials. As such, this  
147 functionality can be used for surveillance purposes, providing a rapid overview of MIC distribution for  
148 a specific collection of isolates and how this compares to isolates from the same host or from  
149 different geographical regions.

150 The Notebook is integrated into the Pathogen portal and can be accessed from  
151 <https://www.ebi.ac.uk/ena/pathogens/home> under the “Explore” tab. Access to pre-publication data  
152 in the AMR data hub requires authentication via login and password with authorization to the  
153 corresponding project.

|                 |                | resistance_phenotype |             |     |     |      |     |     |     |      |      |        | scientific_name |
|-----------------|----------------|----------------------|-------------|-----|-----|------|-----|-----|-----|------|------|--------|-----------------|
| Count           |                | measurement_units    | measurement |     |     |      |     |     |     |      |      |        |                 |
| antibiotic_name |                | country              | mg/L        |     |     |      |     |     |     |      |      |        | Totals          |
| antibiotic_name | country        | 0.015                | 0.25        | 2.0 | 8.0 | 0.03 | 0.5 | 1.0 | 4.0 | 0.12 | 0.06 | Totals |                 |
| ciprofloxacin   | Denmark        | 121                  | 6           |     |     | 12   |     |     |     |      | 1    | 140    |                 |
|                 | Italy          | 13                   |             |     |     |      |     |     |     |      |      | 13     |                 |
|                 | Netherlands    |                      | 2           |     |     |      |     | 1   | 1   |      |      | 4      |                 |
|                 | USA            | 49                   | 11          |     |     | 3    | 2   | 2   | 6   | 2    | 1    | 76     |                 |
|                 | United Kingdom | 92                   | 3           |     | 1   | 4    |     |     |     |      |      | 100    |                 |
|                 | Viet Nam       |                      | 36          | 51  |     |      | 16  | 8   |     |      |      | 111    |                 |
|                 | nan            |                      | 6           |     | 24  |      |     |     |     |      |      | 30     |                 |
| Totals          |                | 275                  | 64          | 51  | 25  | 19   | 18  | 11  | 7   | 2    | 2    | 474    |                 |

154

155 Figure 1: Visualization of the AST data deposited in the database on 15/10/2018. Data were filtered  
 156 for: ciprofloxacin (antibiotic\_name); *E. coli* (scientific\_name) and mg/L (measurement\_units).

157

## 158 Current content

### 159 Statistics

160 As of 15-10-2018 the AMR data hub contains 577 *Escherichia coli* genomes with attached AST data,  
 161 1,842 *Salmonella enterica* and 16 *Enterococcus faecium* originating from 9 different countries. Data  
 162 on susceptibility against 55 different antibiotics (or combinations) have been entered in the database  
 163 so far. As an example, 577 *E. coli* isolates originating from seven different countries (Bangladesh;  
 164 Denmark; Italy; Netherlands; UK; USA and Vietnam) have been tested for ciprofloxacin susceptibility,  
 165 474 by various dilution-based methods and 103 by disk diffusion.

166 A total of 470 *E. coli* antibiograms were submitted directly by COMPARE partners while 107 were  
 167 imported from the US CDC database (n = 31) or previous publications (n = 76)<sup>10,11</sup>.

## 168 Distribution of the MICs

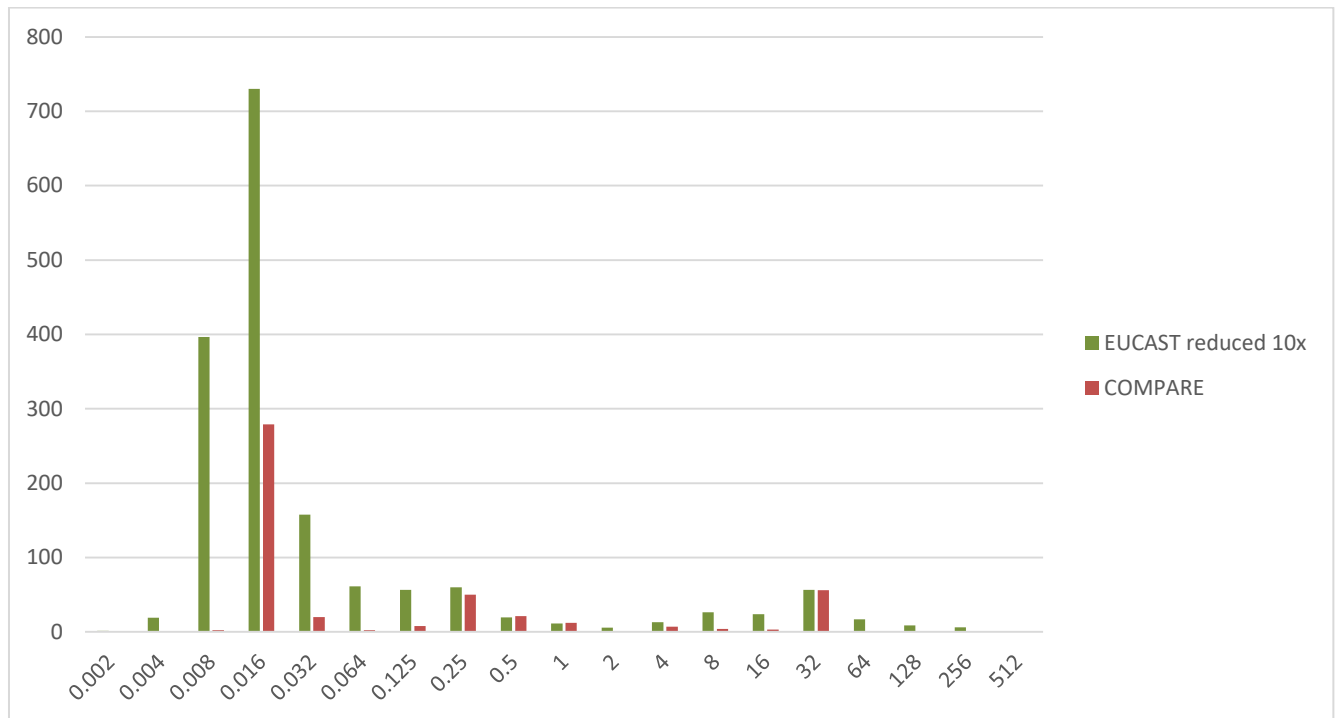

169

170 Figure 2: Distribution of the *E. coli* ciprofloxacin MICs and comparison with ECOFFs  
171 (<https://mic.eucast.org/Eucast2/>).

172 As shown in Figure 2, the distribution of the *E. coli* ciprofloxacin MICs, as an example, recorded in the  
173 present database follows a similar pattern as the ciprofloxacin MICs distribution reported by EUCAST  
174 which is based on more than 20,000 isolates (<https://mic.eucast.org/Eucast2/>).

## 175 Phylogenetic analysis

176 As an example of the possibilities offered by the AMR data hub, the entire collection of *E. coli*  
177 genomes was downloaded and a phylogenetic analysis of the population, in relation to ciprofloxacin  
178 MICs, was performed (methods in supplementary materials). As shown in Figure 3, this population is  
179 highly diverse and features a large range of ciprofloxacin MICs. Several isolates tend to cluster by  
180 country, such as those from Denmark or Vietnam. Additionally, a strong association between  
181 resistance and country can be observed. Most isolates from Vietnam show an MIC higher than 2  
182 mg/ml. The study during which these isolates were collected focused on the presence of ESBL genes  
183 in *E. coli*<sup>12</sup> and it is possible that ciprofloxacin resistance was co-selected for, as was previously  
184 suggested<sup>13</sup>. Additionally, 24 out of 30 isolates retrieved from the CDC antimicrobial resistance  
185 isolate bank (<https://www.cdc.gov/drugresistance/resistance-bank/currently-available.html>)  
186 exhibited an MIC of 8 mg/ml. This unusually high proportion of resistant isolates can be explained by  
187 the purpose of the CDC database, which is to provide a panel of well characterized resistant bacteria  
188 for testing of diagnostic devices and new antibiotic agents. Conversely, isolates from Denmark were  
189 collected as part of a routine surveillance effort from the veterinary institute and appear to all be  
190 susceptible to ciprofloxacin.

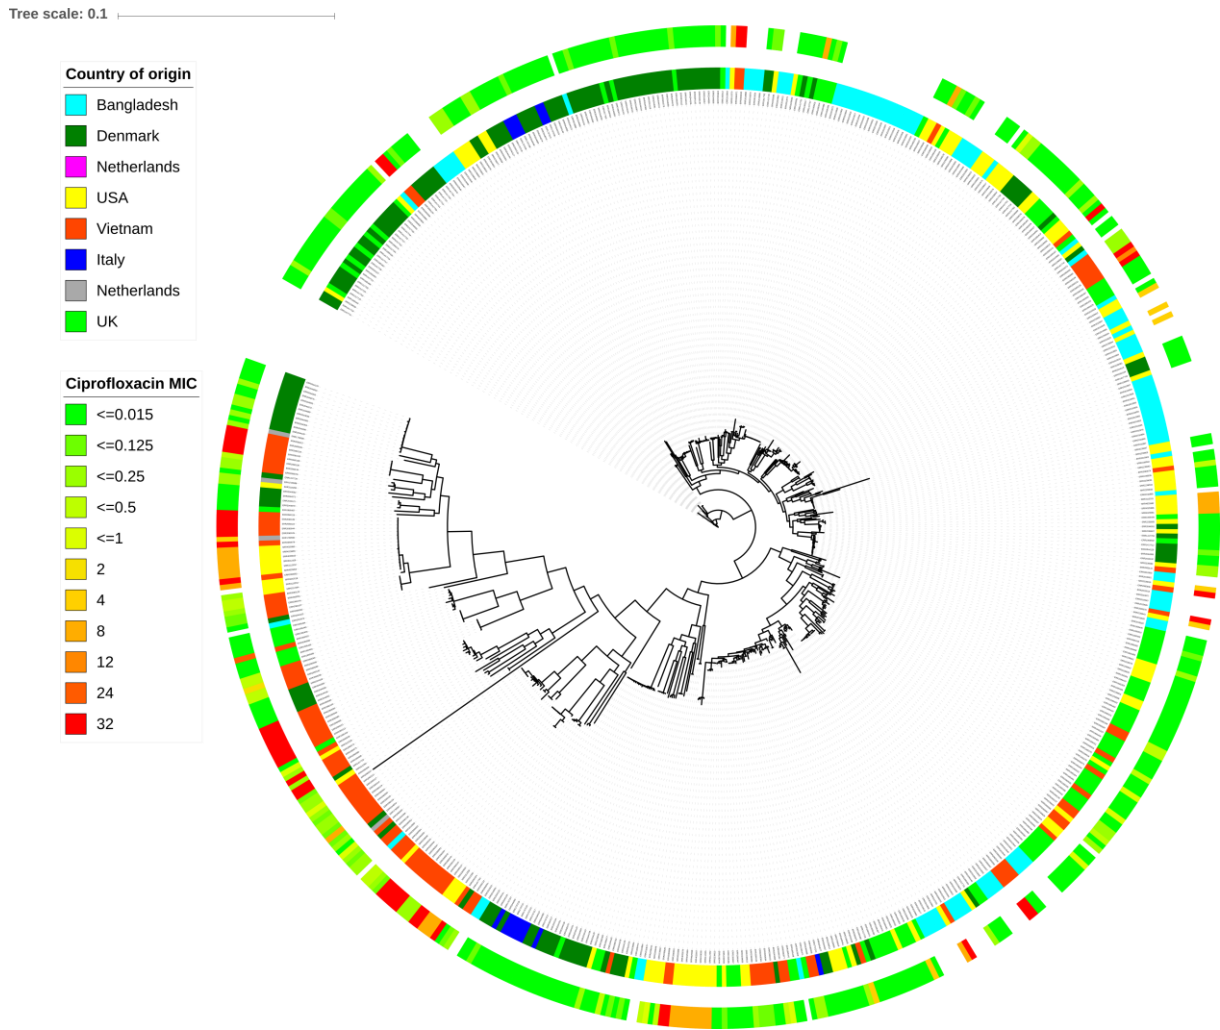

191

192 Figure 3: Maximum likelihood tree based on the alignment of concatenated core genes of 572 *E. coli*  
193 genomes (5 genomes failed quality control or assembly). Country of origin (inner circle) and  
194 ciprofloxacin minimum inhibitory concentration (outer circle) are indicated for each isolate. Zone  
195 diameters values for antibiotic susceptibility were not included in this analysis (isolates from  
196 Bangladesh).

197

## 198 Discussion

199 We have built the AMR data hub with aim to provide a system for public health, food and veterinary  
200 institutes, clinical laboratories and researchers to share their genomic and related AST data. It can be  
201 used for standardized open-access data sharing, for example for published data, thus creating an  
202 ever-growing source of AST metadata available to researchers worldwide. The large volume of data  
203 made available will make it easier to use advanced statistical methods such as machine-learning to  
204 predict AMR phenotypes from genomic data and discover new AMR determinants.

205 It has been recently underlined that application of the Nagoya Protocol, which regulates material and  
206 data sharing, to genetic information might threaten the timely sharing of data in times of public  
207 health emergencies<sup>14</sup>. In allowing the organisation and sharing of linked genomics and AST data, the  
208 AMR data hub promotes openness and accessibility for these important data types while at the same

209 time meeting the privacy concerns for pre-publication data. Considering the exponential rise in the  
210 number of bacterial genomes available, and the threat to modern medicine represented by the rise  
211 of AMR, the establishment of the AMR data hub represents a timely effort to improve collaboration  
212 in this field.

213 The design of a standard data submission format benefited from the expertise of the COMPARE  
214 consortium, a group of international experts in bacterial genomics and AMR surveillance and  
215 research. It is designed to be as exhaustive, and at the same time as flexible as possible to ensure  
216 easy sharing of AST data. The database is hosted at the EMBL-EBI, ensuring its connection to the  
217 world's largest online repository of bacterial genomes.

218 As members of the INSDC, EMBL-EBI and NCBI are part of a joined effort for standardization and  
219 sharing of genomic data. The NCBI can also host antibiograms in a similar format to that presented  
220 here, and efforts are currently ongoing to allow automated synchronization of content from both  
221 sides. This will greatly increase the flexibility and the reach of the AMR data hub. While NCBI data  
222 must be made public immediately upon deposition, EBI allows for pre-publication data to be kept  
223 private for a provider-defined period. Participating institutions can thus choose whether they want  
224 their data to be open-access immediately or whether they prefer sharing it with selected members of  
225 a consortium before public release.

226 The view is that the AMR data hub will soon become an essential resource for functional genomic  
227 studies of AMR. By encouraging data providers from different fields and geographical origin to share  
228 their data, this collection can greatly improve our ability to answer questions related to the current  
229 AMR crisis.

230

231



## 232 Acknowledgements

233 This study was supported by the COMPARE Consortium, which has received funding from the  
234 European Union's Horizon 2020 research and innovation programme under grant agreement No.  
235 643476.

236 Contributing institutions for AST data: Amsterdam UMC<sup>1</sup>, APHA<sup>11</sup>, DTU<sup>2</sup>, FM<sup>7</sup>, OUCRU<sup>13</sup>, SSH<sup>12</sup>,  
237 UNIBO<sup>10</sup>.

238 The COMPARE ML-AMR group: S. Matamoros<sup>1</sup>; V. Janes<sup>1</sup>; R. S. Hendriksen<sup>2</sup>; O. Lund<sup>2</sup>; P. Clausen<sup>2</sup>; B.  
239 Pataki<sup>3,4</sup>; D. Visontai<sup>3,4</sup>; J. Stéger<sup>3,4</sup>; JM. Szalai-Gindl<sup>3,4</sup>; I. Csabai<sup>3,4</sup>; N. Pakseresht<sup>5</sup>; M. Rossello<sup>5</sup>; N.  
240 Silvester<sup>5</sup>; C. Amid<sup>5</sup>; G. Cochrane<sup>5</sup>; C. Schultsz<sup>1-6</sup>; F. Pradel<sup>7</sup>; E. Westeel<sup>7</sup>; S. Fuchs<sup>8</sup>; S. Malhotra  
241 Kumar<sup>9</sup>; B. Britto Xavier<sup>9</sup>; M. Nguyen Ngoc<sup>9</sup>; D. Remondini<sup>10</sup>; E. Giampieri<sup>10</sup>; F. Pasquali<sup>11</sup>; L.  
242 Petrovska<sup>12</sup>; D. Ajayi<sup>12</sup>; E. M. Nielsen<sup>13</sup>; N. V. Trung<sup>14</sup>; N. T. Hoa<sup>14</sup>.

243 <sup>1</sup>: Amsterdam UMC, University of Amsterdam, Department of Medical Microbiology, Amsterdam, The  
244 Netherlands.

245 <sup>2</sup>: National Food Institute, Technical University of Denmark, Lyngby, Denmark.

246 <sup>3</sup>: Department of Physics of Complex Systems, ELTE Eötvös Loránd University, Budapest, Hungary.

247 <sup>4</sup>: Department of Computational Sciences, Wigner Research Centre for Physics of the HAS, Budapest,  
248 Hungary.

249 <sup>5</sup>: European Molecular Biology Laboratory (EMBL) Outstation, European Bioinformatics Institute (EBI),  
250 Wellcome Trust Genome Campus, Hinxton, Cambridge, UK.

251 <sup>6</sup>: Amsterdam UMC, University of Amsterdam, Department of Global Health, Amsterdam Institute for  
252 Global Health and Development, Amsterdam, The Netherlands.

253 <sup>7</sup>: Fondation Mérieux, Lyon, France.

254 <sup>8</sup>: Department of Infectious Diseases, Robert Koch Institut, Berlin, Germany.

255 <sup>9</sup>: Department of Medical Microbiology, Vaccine & Infectious Disease Institute, Antwerp University,  
256 University Hospital Antwerp, Antwerp, Belgium.

257 <sup>10</sup>: Department of Physics and Astronomy (DIFA), University of Bologna, Bologna, Italy.

258 <sup>11</sup>: Department of Agricultural and Food Sciences (DISTAL), University of Bologna, Bologna, Italy.

259 <sup>12</sup>: Animal and Plant Health Agency, Addlestone, Surrey, United Kingdom.

260 <sup>13</sup>: Statens Serum Institut, Denmark.

261 <sup>14</sup>: Oxford University Clinical Research Unit, Centre for Tropical Medicine, Ho Chi Minh City, Vietnam

262

263

## 264 **References**

- 265 1. Aminov, R. I. A Brief History of the Antibiotic Era: Lessons Learned and Challenges for the  
266 Future. *Front. Microbiol.* **1**, 134 (2010).
- 267 2. WHO. *Antimicrobial resistance: global report on surveillance*. *Who* (2014).
- 268 3. van Dijk, E. L., Auger, H., Jaszczyszyn, Y. & Thermes, C. Ten years of next-generation  
269 sequencing technology. *Trends Genet.* **30**, 418–426 (2014).
- 270 4. Kavas, E. S. *et al.* Machine learning and structural analysis of Mycobacterium tuberculosis  
271 pan-genome identifies genetic signatures of antibiotic resistance. *Nat. Commun.* **9**, 4306  
272 (2018).
- 273 5. Niehaus, K. E., Walker, T. M., Crook, D. W., Peto, T. E. A. & Clifton, D. A. Machine learning for  
274 the prediction of antibacterial susceptibility in Mycobacterium tuberculosis. *2014 IEEE-EMBS*  
275 *Int. Conf. Biomed. Heal. Informatics, BHI 2014* 618–621 (2014).
- 276 6. Davis, J. J. *et al.* Antimicrobial Resistance Prediction in PATRIC and RAST. *Nat. Publ. Gr.* 1–12  
277 (2016).
- 278 7. Otto, M. Next-generation sequencing to monitor the spread of antimicrobial resistance.  
279 *Genome Med.* **9**, 68 (2017).
- 280 8. van Panhuis, W. G. *et al.* A systematic review of barriers to data sharing in public health. *BMC*  
281 *Public Health* **14**, 1144 (2014).
- 282 9. Harrison, P. W. *et al.* The European Nucleotide Archive in 2018. *Nucleic Acids Res.* **47**, D84–  
283 D88 (2019).
- 284 10. Tyson, G. H. *et al.* WGS accurately predicts antimicrobial resistance in Escherichia coli. *J.*  
285 *Antimicrob. Chemother.* **70**, 2763–2769 (2015).
- 286 11. Tyson, G. H. *et al.* Establishing genotypic cutoff values to measure antimicrobial resistance in  
287 Salmonella. *Antimicrob. Agents Chemother.* **61**, (2017).
- 288 12. Nguyen, V. T. *et al.* Prevalence and risk factors for carriage of antimicrobial-resistant  
289 Escherichia coli on household and small-scale chicken farms in the Mekong Delta of Vietnam.  
290 *J. Antimicrob. Chemother.* **70**, 2144–2152 (2015).
- 291 13. Wiener, E. S., Heil, E. L., Hynicka, L. M. & Johnson, J. K. Are Fluoroquinolones Appropriate for  
292 the Treatment of Extended-Spectrum  $\beta$ -Lactamase-Producing Gram-Negative Bacilli? *J.*  
293 *Pharm. Technol.* **32**, 16–21 (2015).
- 294 14. dos S. Ribeiro, C., Koopmans, M. P. & Haringhuizen, G. B. Threats to timely sharing of  
295 pathogen sequence data. *Science (80- )*. **362**, 404 LP-406 (2018).

296
